# Supplementary material for: One-pot synthesis of Cs3Cu2I5 nanocrystals based on thermodynamic equilibrium
Source: Royal Society of Chemistry journal article supplement (doi:10.1039/d1qm00481f), 2021-01-01
Supplement: d1qm00481f1.pdf [file d1qm00481f1.pdf]

## Electronic Supporting Information

### One-pot synthesis of $\text{Cs}_3\text{Cu}_2\text{I}_5$ nanocrystals based on thermodynamic equilibrium

Xudong Hu, Yuelei Li, Ye Wu, Weiwei Chen, Haibo Zeng and Xiaoming Li\*

*Key Laboratory of Advanced Display Materials and Devices, Ministry of Industry and Information Technology, Institute of Optoelectronics & Nanomaterials, School of Material Science and Engineering, Nanjing University of Science and Technology, Nanjing 210094, P. R. China.*

\* Corresponding author.

*E-mail addresses:* [lixiaoming@njjust.edu.cn](mailto:lixiaoming@njjust.edu.cn).

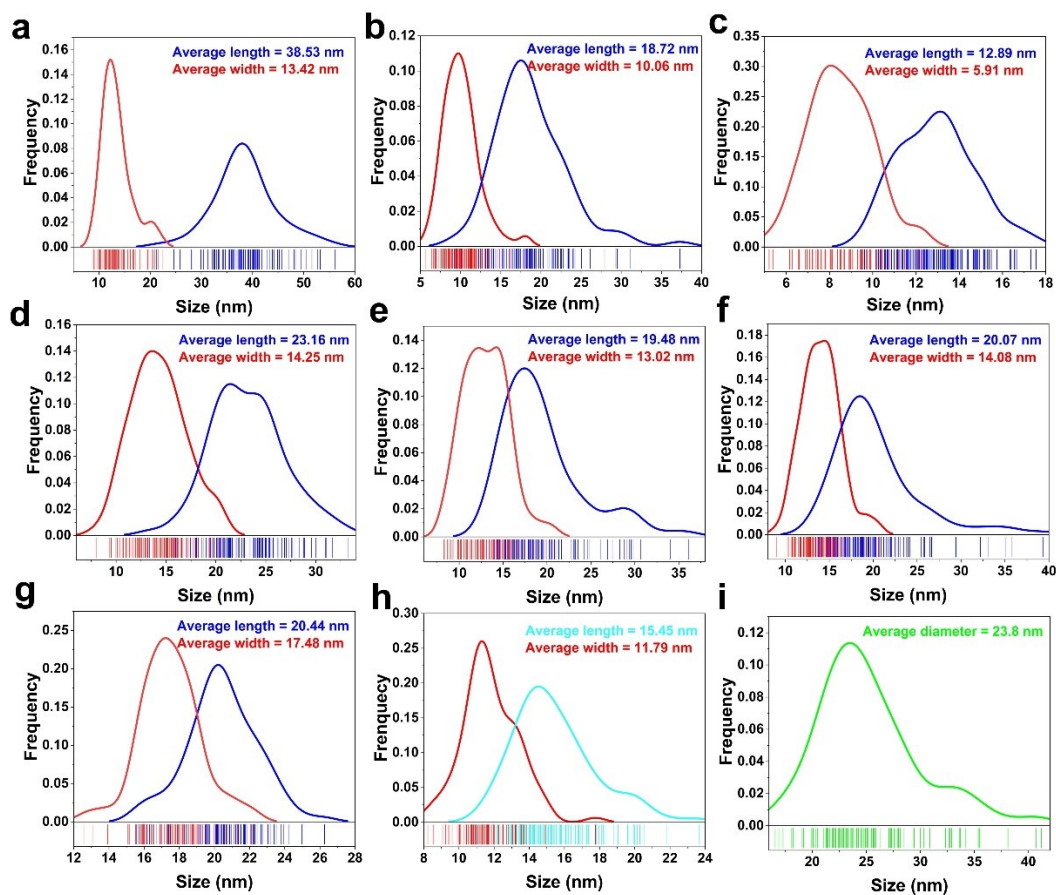

**Fig. S1.** The particle size distribution of  $\text{Cs}_3\text{Cu}_2\text{I}_5$  NCs at different amount of  $\text{ZnI}_2$  and different temperature. (a) 0.4 mmol, 100 °C. (b) 0.8 mmol, 100 °C. (c) 1.2 mmol, 100 °C. (d) 1.6 mmol, 100 °C. (e) 1.2 mmol, 120 °C. (f) 1.2 mmol, 140 °C. (g) 1.2 mmol, 160 °C. The particle size distribution of  $\text{Cs}_3\text{Cu}_2\text{X}_5$  (X = Br, Cl) NCs with (h) 1.2 mmol  $\text{ZnBr}_2$  and (i)  $\text{MnCl}_2$  at 100 °C.

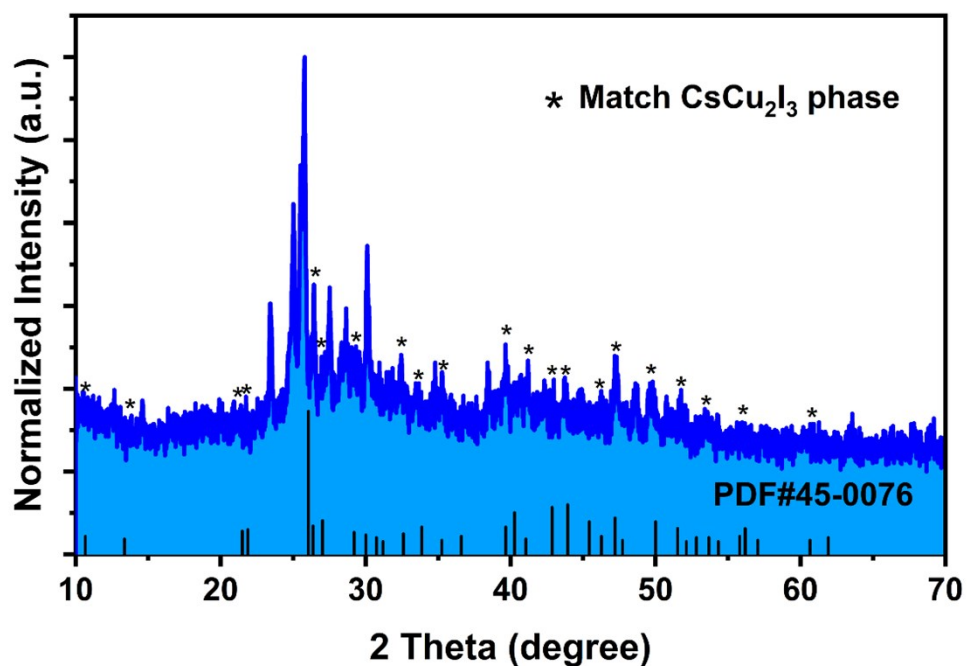

**Fig. S2.** XRD pattern of the precipitation at 1.6 mmol of  $\text{ZnI}_2$ . Obvious  $\text{CsCu}_2\text{I}_3$  phase was observed.

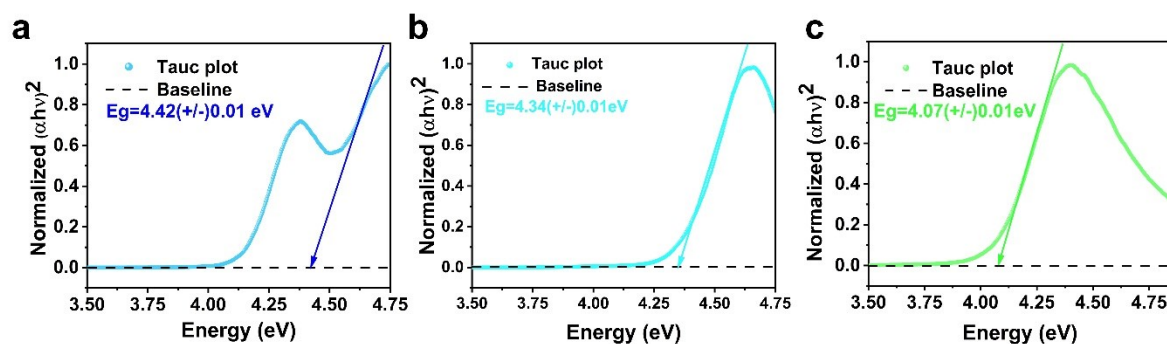

**Fig. S3.** Band gaps of (a)  $\text{Cs}_3\text{Cu}_2\text{I}_5$  NCs, (b)  $\text{Cs}_3\text{Cu}_2\text{Br}_5$  NCs, and (c)  $\text{Cs}_3\text{Cu}_2\text{Cl}_5$  NCs calculated by Tauc plot.

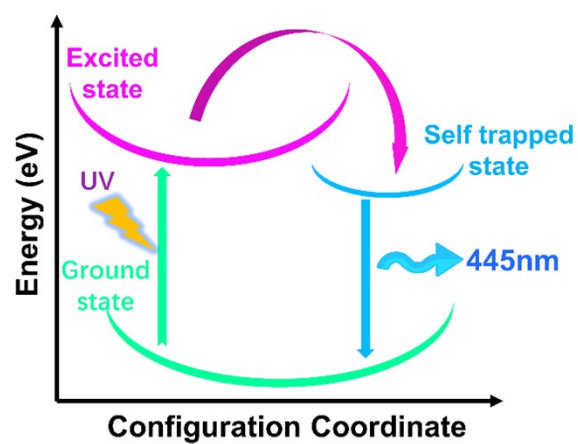

Fig. S4. Self-trapped exciton model of  $\text{Cs}_3\text{Cu}_2\text{I}_5$  NCs.

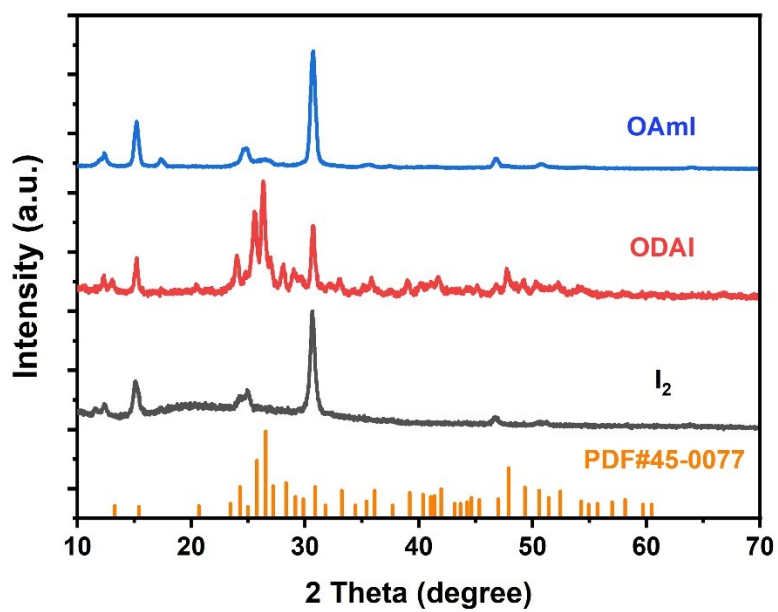

Fig. S5. XRD patterns of  $\text{Cs}_3\text{Cu}_2\text{I}_5$  NCs prepared with OLA-I, ODA-I, and  $\text{I}_2$ .

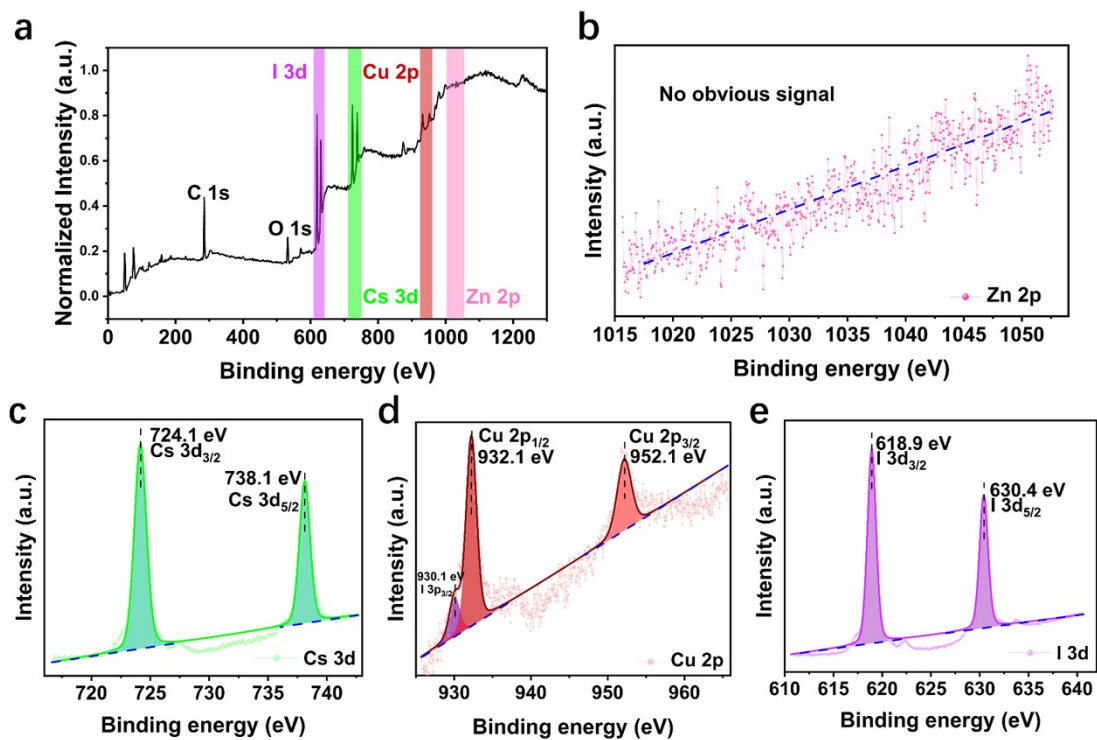

**Fig. S6.** The XPS survey of  $\text{Cs}_3\text{Cu}_2\text{I}_5$  NCs. (a) Full spectra. (b) Zn 2p. (c) Cs 3d. (d) Cu 2p. (e) I 3d.

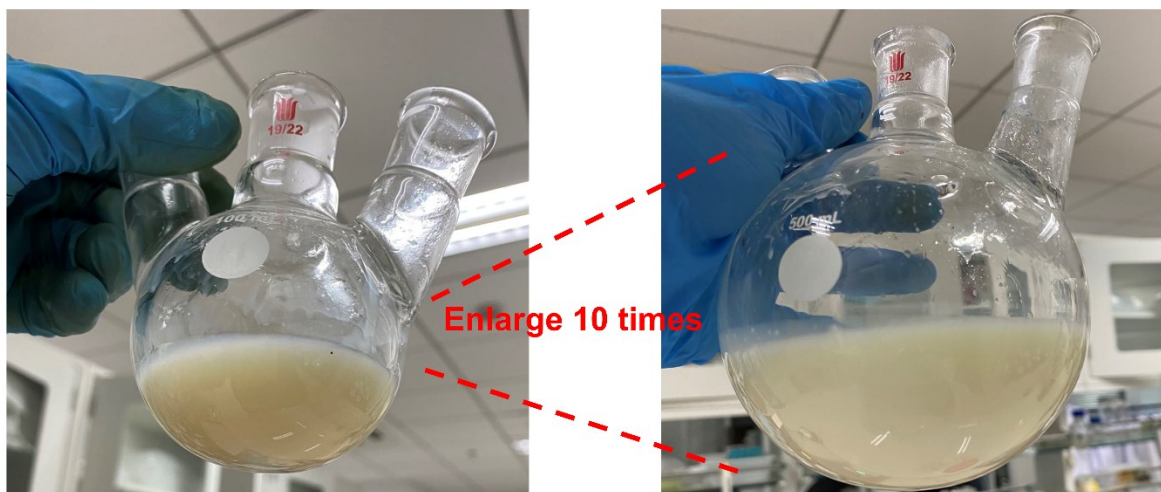

**Fig. S7.** Mass production of  $\text{Cs}_3\text{Cu}_2\text{I}_5$  NCs by enlarging the reactant amount by 10 times.

**Exponential fitting of PL decays and calculation.** Decay time of the samples was obtained from the decay curves, which is simulated by using a bi-exponential decay function (1):

$$I(t) = A_0 + A_1 e^{(-t/\tau_1)} + A_2 e^{(-t/\tau_2)} \quad (1)$$

Where  $I(t)$  is the PL intensity at time  $t$ ,  $A_i$  are the weight constants,  $\tau_1$  and  $\tau_2$  represent the PL decay time. The mean lifetime  $\tau_{ave}$  is calculated by the formula (2):

$$\tau_{ave} = \frac{A \tau_1^2 + B \tau_2^2}{A \tau_1 + B \tau_2} \quad (2)$$

Where A and B represent the ratio of component contribution to the decay.

**Table S1.** Summary of time-resolved PL decay measurements, where the lifetimes of samples are tested in cyclohexane solution.  $\tau_1$  and  $\tau_2$  are the detailed recombination lifetimes, A and B represent the ratio of component contribution to the decay.

| Cs <sub>3</sub> Cu <sub>2</sub> X <sub>5</sub> NCs  | $\tau_1$ ( $\mu$ s) | A (%) | $\tau_2$ ( $\mu$ s) | B (%) | $\tau_{ave}$ ( $\mu$ s) |
|-----------------------------------------------------|---------------------|-------|---------------------|-------|-------------------------|
| Cs <sub>3</sub> Cu <sub>2</sub> I <sub>5</sub> NCs  | 0.35                | 23.45 | 1.22                | 76.55 | 1.15                    |
| Cs <sub>3</sub> Cu <sub>2</sub> Br <sub>5</sub> NCs | 1.44                | 29.02 | 4.65                | 70.98 | 4.29                    |
| Cs <sub>3</sub> Cu <sub>2</sub> Cl <sub>5</sub> NCs | 25.53               | 39.50 | 120.74              | 60.50 | 109.20                  |

**ICP-OES calculation.** The element fraction is calculated by the following formula:

$$C_x(\text{mg/kg}) = \frac{C_0(\text{mg/L}) f V_0(\text{mL}) * 10^{-3}}{m(\text{g}) * 10^{-3}} = \frac{C_1(\text{mg/L}) V_0(\text{mL}) * 10^{-3}}{m(\text{g}) * 10^{-3}} \quad (1)$$

$$W(\%) = \frac{C_x(\text{mg/kg})}{10^6} * 100\% \quad (2)$$

$$C_1(\text{mg/kg}) = C_0(\text{mg/L}) * f \quad (3)$$

Where  $m_0$  is the mass of the sample taken for analysis,  $V_0$  is the volume of the sample after digestion,  $C_0$  is the concentration of elements in the test solution,  $f$  is the diluted multiples.  $C_1$  is the element concentration of stock solution,  $C_x$  is the final test result of the tested element,  $W$  is the final percentage of the element.

**Table S2.** The detail conclusion data measured by ICP-OES.

| $m_0$ (mg) | $V_0$ (mL) | Element | $C_0$ (mg/L) | $f$ | $C_1$ (mg/L) | $C_x$ (mg/kg) | $W$ (%) |
|------------|------------|---------|--------------|-----|--------------|---------------|---------|
| 48.3       | 50         | Zn      | 0.78         | 1   | 0.78         | /             | 0.08    |
